# Supplementary material for: Evaluation of the Effect of the ENSO Cycle on the Distribution Potential of the Genus Anastrepha of Horticultural Importance in the Neotropics and Panama
Source: MDPI journal article supplement (doi:10.3390/insects14080714), 2023-08-18
Supplement: s1 [file s1]

**Table S1. *Anastrepha* spp. Species Database**

| Species,<br>Longitude,<br>Latitude                     | Source                                                                                                                                   |
|--------------------------------------------------------|------------------------------------------------------------------------------------------------------------------------------------------|
| <i>A.grandis</i> , -<br>78.170000000000,8.76580000000  | Tesis <a href="http://up-rid.up.ac.pa/id/eprint/348">http://up-rid.up.ac.pa/id/eprint/348</a>                                            |
| <i>A.grandis</i> , -<br>80.000000000000,9.00000000000  | CABI <a href="https://www.cabidigitallibrary.org">https://www.cabidigitallibrary.org</a> (last access March 3, 2022 CABI-1942-2020-5649) |
| <i>A.grandis</i> , -64.00000000000,-<br>34.00000000000 | CABI <a href="https://www.cabidigitallibrary.org">https://www.cabidigitallibrary.org</a> (last access March 3, 2022 CABI-1942-2020-5649) |
| <i>A.grandis</i> , -54.38440000000,-<br>26.71440000000 | GBIF <a href="https://doi.org/10.15468/dl.62">https://doi.org/10.15468/dl.62</a><br>pb98                                                 |
| <i>A.grandis</i> , -65.00000000000,-<br>17.00000000000 | CABI <a href="https://www.cabidigitallibrary.org">https://www.cabidigitallibrary.org</a> (last access March 3, 2022 CABI-1942-2020-5649) |
| <i>A.grandis</i> , -64.38139000000,-<br>22.71527900000 | GBIF <a href="https://doi.org/10.15468/dl.62">https://doi.org/10.15468/dl.62</a><br>pb98                                                 |
| <i>A.grandis</i> , -55.00000000000,-<br>10.00000000000 | CABI <a href="https://www.cabidigitallibrary.org">https://www.cabidigitallibrary.org</a> (last access March 3, 2022 CABI-1942-2020-5649) |
| <i>A.grandis</i> , -42.00000000000,-<br>12.00000000000 | CABI <a href="https://www.cabidigitallibrary.org">https://www.cabidigitallibrary.org</a> (last access March 3, 2022 CABI-1942-2020-5649) |
| <i>A.grandis</i> , -40.75000000000,-<br>20.00000000000 | CABI <a href="https://www.cabidigitallibrary.org">https://www.cabidigitallibrary.org</a> (last access March 3, 2022 CABI-1942-2020-5649) |
| <i>A.grandis</i> , -49.63623000000,-<br>15.58071000000 | CABI <a href="https://www.cabidigitallibrary.org">https://www.cabidigitallibrary.org</a> (last access March 3, 2022 CABI-1942-2020-5649) |
| <i>A.grandis</i> , -56.00000000000,-<br>13.00000000000 | CABI <a href="https://www.cabidigitallibrary.org">https://www.cabidigitallibrary.org</a> (last access March 3, 2022 CABI-1942-2020-5649) |
| <i>A.grandis</i> , -55.00000000000,-<br>20.50000000000 | CABI <a href="https://www.cabidigitallibrary.org">https://www.cabidigitallibrary.org</a> (last access March 3, 2022 CABI-1942-2020-5649) |
| <i>A.grandis</i> , -51.33333000000,-<br>24.50000000000 | CABI <a href="https://www.cabidigitallibrary.org">https://www.cabidigitallibrary.org</a> (last access March 3, 2022 CABI-1942-2020-5649) |
| <i>A.grandis</i> , -42.50000000000,-<br>22.25000000000 | CABI <a href="https://www.cabidigitallibrary.org">https://www.cabidigitallibrary.org</a> (last access March 3, 2022 CABI-1942-2020-5649) |
| <i>A.grandis</i> , -53.50000000000,-<br>30.00000000000 | CABI <a href="https://www.cabidigitallibrary.org">https://www.cabidigitallibrary.org</a> (last access March 3, 2022 CABI-1942-2020-5649) |
| <i>A.grandis</i> , -50.00000000000,-<br>27.00000000000 | CABI <a href="https://www.cabidigitallibrary.org">https://www.cabidigitallibrary.org</a> (last access March 3, 2022 CABI-1942-2020-5649) |
| <i>A.grandis</i> , -49.00000000000,-<br>22.00000000000 | CABI <a href="https://www.cabidigitallibrary.org">https://www.cabidigitallibrary.org</a> (last access March 3, 2022 CABI-1942-2020-5649) |
| <i>A.grandis</i> , -47.87643300000,-<br>15.73301300000 | GBIF <a href="https://doi.org/10.15468/dl.62">https://doi.org/10.15468/dl.62</a><br>pb98                                                 |

|                                                        |             |                                                                                                                                                                               |
|--------------------------------------------------------|-------------|-------------------------------------------------------------------------------------------------------------------------------------------------------------------------------|
| <i>A.grandis</i> , -42.36260000000,-<br>21.98030000000 | GBIF        | <a href="https://doi.org/10.15468/dl.62pb98">https://doi.org/10.15468/dl.62pb98</a>                                                                                           |
| <i>A.grandis</i> , -47.13540000000,-<br>23.53080000000 | GBIF        | <a href="https://doi.org/10.15468/dl.62pb98">https://doi.org/10.15468/dl.62pb98</a>                                                                                           |
| <i>A.grandis</i> , -57.29610000000,-<br>25.31060000000 | GBIF        | <a href="https://doi.org/10.15468/dl.62pb98">https://doi.org/10.15468/dl.62pb98</a>                                                                                           |
| <i>A.grandis</i> , -<br>73.25000000000,4.0000000000    | CABI        | <a href="https://www.cabidigitallibrary.org">https://www.cabidigitallibrary.org</a> (last access March 3, 2022 CABI-1942-2020-5649)                                           |
| <i>A.grandis</i> , -<br>75.76000200000,4.3800000000    | GBIF        | <a href="https://doi.org/10.15468/dl.62pb98">https://doi.org/10.15468/dl.62pb98</a>                                                                                           |
| <i>A.grandis</i> , -<br>75.63418000000,6.1579200000    | GBIF        | <a href="https://doi.org/10.15468/dl.62pb98">https://doi.org/10.15468/dl.62pb98</a>                                                                                           |
| <i>A.grandis</i> , -<br>74.29730000000,4.5709000000    | GBIF        | <a href="https://doi.org/10.15468/dl.62pb98">https://doi.org/10.15468/dl.62pb98</a>                                                                                           |
| <i>A.grandis</i> , -<br>76.56980000000,3.3723000000    | GBIF        | <a href="https://doi.org/10.15468/dl.62pb98">https://doi.org/10.15468/dl.62pb98</a>                                                                                           |
| <i>A.grandis</i> , -78.25000000000,-<br>1.25000000000  | CABI        | <a href="https://www.cabidigitallibrary.org">https://www.cabidigitallibrary.org</a> (last access March 3, 2022 CABI-1942-2020-5649)                                           |
| <i>A.grandis</i> , -77.84018700000,-<br>1.61747100000  | GBIF        | <a href="https://doi.org/10.15468/dl.62pb98">https://doi.org/10.15468/dl.62pb98</a>                                                                                           |
| <i>A.grandis</i> , -75.25000000000,-<br>10.00000000000 | CABI        | <a href="https://www.cabidigitallibrary.org">https://www.cabidigitallibrary.org</a> (last access March 3, 2022 CABI-1942-2020-5649)                                           |
| <i>A.grandis</i> , -71.40280000000,-<br>12.89500000000 | GBIF        | <a href="https://doi.org/10.15468/dl.62pb98">https://doi.org/10.15468/dl.62pb98</a>                                                                                           |
| <i>A.grandis</i> , -58.00000000000,-<br>23.33333000000 | CABI        | <a href="https://www.cabidigitallibrary.org">https://www.cabidigitallibrary.org</a> (last access March 3, 2022 CABI-1942-2020-5649)                                           |
| <i>A.grandis</i> , -<br>66.00000000000,8.0000000000    | CABI        | <a href="https://www.cabidigitallibrary.org">https://www.cabidigitallibrary.org</a> (last access March 3, 2022 CABI-1942-2020-5649)                                           |
| <i>A.grandis</i> , -52.40416700000,-<br>26.87694400000 | SPECI<br>ES | <a href="http://www.splink.org.br/">http://www.splink.org.br/</a> speciesLink network, 16-Jun-2022 12:51, <a href="https://specieslink.net/search">specieslink.net/search</a> |
| <i>A.grandis</i> , -53.16805600000,-<br>26.89388900000 | SPECI<br>ES | <a href="http://www.splink.org.br/">http://www.splink.org.br/</a> speciesLink network, 16-Jun-2022 12:51, <a href="https://specieslink.net/search">specieslink.net/search</a> |
| <i>A.grandis</i> , -44.31810000000,-<br>23.00670100000 | SPECI<br>ES | <a href="http://www.splink.org.br/">http://www.splink.org.br/</a> speciesLink network, 16-Jun-2022 12:51, <a href="https://specieslink.net/search">specieslink.net/search</a> |
| <i>A.grandis</i> , -55.34456100000,-<br>27.31669300000 | CABI        | <a href="https://www.cabidigitallibrary.org">https://www.cabidigitallibrary.org</a> (last access March 3, 2022 CABI-1942-2020-5649)                                           |
| <i>A.grandis</i> , -54.74168000000,-<br>26.57173400000 | SPECI<br>ES | <a href="http://www.splink.org.br/">http://www.splink.org.br/</a> speciesLink network, 16-Jun-2022 12:51, <a href="https://specieslink.net/search">specieslink.net/search</a> |
| <i>A.grandis</i> , -58.01699600000,-<br>31.39341300000 | CABI        | <a href="https://www.cabidigitallibrary.org">https://www.cabidigitallibrary.org</a> (last access March 3, 2022 CABI-1942-2020-5649)                                           |

|                                                          |      |                                                                                                                                       |
|----------------------------------------------------------|------|---------------------------------------------------------------------------------------------------------------------------------------|
| <i>A.grandis</i> , -63.806003000000, -22.517531000000    | GBIF | <a href="https://doi.org/10.15468/dl.62pb98">https://doi.org/10.15468/dl.62pb98</a>                                                   |
| <i>A.serpentina</i> , -89.389999000000, 18.510000000000  | GBIF | <a href="https://doi.org/10.15468/dl.t653n6">https://doi.org/10.15468/dl.t653n6</a>                                                   |
| <i>A.serpentina</i> , -95.169998000000, 18.500000000000  | GBIF | <a href="https://doi.org/10.15468/dl.t653n6">https://doi.org/10.15468/dl.t653n6</a>                                                   |
| <i>A.serpentina</i> , -100.949997000000, 25.299999000000 | GBIF | <a href="https://doi.org/10.15468/dl.t653n6">https://doi.org/10.15468/dl.t653n6</a>                                                   |
| <i>A.serpentina</i> , -97.010002000000, 18.920000000000  | GBIF | <a href="https://doi.org/10.15468/dl.t653n6">https://doi.org/10.15468/dl.t653n6</a>                                                   |
| <i>A.serpentina</i> , -89.644100000000, 21.102139000000  | GBIF | <a href="https://doi.org/10.15468/dl.t653n6">https://doi.org/10.15468/dl.t653n6</a>                                                   |
| <i>A.serpentina</i> , -98.959395000000, 18.905876000000  | GBIF | <a href="https://doi.org/10.15468/dl.t653n6">https://doi.org/10.15468/dl.t653n6</a>                                                   |
| <i>A.serpentina</i> , -89.895000000000, 18.564444000000  | GBIF | <a href="https://doi.org/10.15468/dl.t653n6">https://doi.org/10.15468/dl.t653n6</a>                                                   |
| <i>A.serpentina</i> , -90.060833000000, 18.975278000000  | GBIF | <a href="https://doi.org/10.15468/dl.t653n6">https://doi.org/10.15468/dl.t653n6</a>                                                   |
| <i>A.serpentina</i> , -98.660000000000, 20.987778000000  | GBIF | <a href="https://doi.org/10.15468/dl.t653n6">https://doi.org/10.15468/dl.t653n6</a>                                                   |
| <i>A.serpentina</i> , -92.183000000000, 14.817000000000  | GBIF | <a href="https://doi.org/10.15468/dl.t653n6">https://doi.org/10.15468/dl.t653n6</a>                                                   |
| <i>A.serpentina</i> , -102.000000000000, 23.000000000000 | CABI | <a href="https://www.cabidigitallibrary.org">https://www.cabidigitallibrary.org</a> (last access March 3, 2022 CABI 1934-2021 - 5665) |
| <i>A.serpentina</i> , -83.566714000000, 8.679096000000   | GBIF | <a href="https://doi.org/10.15468/dl.t653n6">https://doi.org/10.15468/dl.t653n6</a>                                                   |
| <i>A.serpentina</i> , -85.352345000000, 10.349119000000  | GBIF | <a href="https://doi.org/10.15468/dl.t653n6">https://doi.org/10.15468/dl.t653n6</a>                                                   |
| <i>A.serpentina</i> , -84.608126000000, 9.776494000000   | GBIF | <a href="https://doi.org/10.15468/dl.t653n6">https://doi.org/10.15468/dl.t653n6</a>                                                   |
| <i>A.serpentina</i> , -83.459163000000, 9.818357000000   | GBIF | <a href="https://doi.org/10.15468/dl.t653n6">https://doi.org/10.15468/dl.t653n6</a>                                                   |
| <i>A.serpentina</i> , -85.541069000000, 10.983166000000  | GBIF | <a href="https://doi.org/10.15468/dl.t653n6">https://doi.org/10.15468/dl.t653n6</a>                                                   |
| <i>A.serpentina</i> , -84.485101000000, 10.201361000000  | CABI | <a href="https://www.cabidigitallibrary.org">https://www.cabidigitallibrary.org</a> (last access March 3, 2022 CABI 1934-2021 - 5665) |
| <i>A.serpentina</i> , -85.059952000000, 9.867095000000   | GBIF | <a href="https://doi.org/10.15468/dl.t653n6">https://doi.org/10.15468/dl.t653n6</a>                                                   |
| <i>A.serpentina</i> , -83.030709000000, 9.661438000000   | GBIF | <a href="https://doi.org/10.15468/dl.t653n6">https://doi.org/10.15468/dl.t653n6</a>                                                   |

|                                                            |      |                                                                                     |
|------------------------------------------------------------|------|-------------------------------------------------------------------------------------|
| <i>A.serpentina</i> , -<br>85.38412300000,9.88585400000    | GBIF | <a href="https://doi.org/10.15468/dl.t653n6">https://doi.org/10.15468/dl.t653n6</a> |
| <i>A.serpentina</i> , -<br>85.63368800000,10.13416800000   | GBIF | <a href="https://doi.org/10.15468/dl.t653n6">https://doi.org/10.15468/dl.t653n6</a> |
| <i>A.serpentina</i> , -<br>85.02993400000,10.71888100000   | GBIF | <a href="https://doi.org/10.15468/dl.t653n6">https://doi.org/10.15468/dl.t653n6</a> |
| <i>A.serpentina</i> , -<br>84.78362300000,10.44039400000   | GBIF | <a href="https://doi.org/10.15468/dl.t653n6">https://doi.org/10.15468/dl.t653n6</a> |
| <i>A.serpentina</i> , -<br>84.31692400000,9.84894300000    | GBIF | <a href="https://doi.org/10.15468/dl.t653n6">https://doi.org/10.15468/dl.t653n6</a> |
| <i>A.serpentina</i> , -<br>85.35191300000,10.77678400000   | GBIF | <a href="https://doi.org/10.15468/dl.t653n6">https://doi.org/10.15468/dl.t653n6</a> |
| <i>A.serpentina</i> , -<br>82.79293600000,8.89147300000    | GBIF | <a href="https://doi.org/10.15468/dl.t653n6">https://doi.org/10.15468/dl.t653n6</a> |
| <i>A.serpentina</i> , -<br>83.26379900000,8.97909600000    | GBIF | <a href="https://doi.org/10.15468/dl.t653n6">https://doi.org/10.15468/dl.t653n6</a> |
| <i>A.serpentina</i> , -<br>84.00000000000,10.00000000000   | GBIF | <a href="https://doi.org/10.15468/dl.t653n6">https://doi.org/10.15468/dl.t653n6</a> |
| <i>A.serpentina</i> , -63.82000000000, -<br>18.13999900000 | GBIF | <a href="https://doi.org/10.15468/dl.t653n6">https://doi.org/10.15468/dl.t653n6</a> |
| <i>A.serpentina</i> , -63.44683000000, -<br>17.67657000000 | GBIF | <a href="https://doi.org/10.15468/dl.t653n6">https://doi.org/10.15468/dl.t653n6</a> |
| <i>A.serpentina</i> , -64.37243000000, -<br>17.24656700000 | GBIF | <a href="https://doi.org/10.15468/dl.t653n6">https://doi.org/10.15468/dl.t653n6</a> |
| <i>A.serpentina</i> , -43.61000100000, -<br>19.34000000000 | GBIF | <a href="https://doi.org/10.15468/dl.t653n6">https://doi.org/10.15468/dl.t653n6</a> |
| <i>A.serpentina</i> , -55.49150000000, -<br>8.78320000000  | GBIF | <a href="https://doi.org/10.15468/dl.t653n6">https://doi.org/10.15468/dl.t653n6</a> |
| <i>A.serpentina</i> , -44.31580000000, -<br>23.00570000000 | GBIF | <a href="https://doi.org/10.15468/dl.t653n6">https://doi.org/10.15468/dl.t653n6</a> |
| <i>A.serpentina</i> , -52.40000000000, -<br>27.05000000000 | GBIF | <a href="https://doi.org/10.15468/dl.t653n6">https://doi.org/10.15468/dl.t653n6</a> |
| <i>A.serpentina</i> , -56.13500000000, -<br>2.03770000000  | GBIF | <a href="https://doi.org/10.15468/dl.t653n6">https://doi.org/10.15468/dl.t653n6</a> |
| <i>A.serpentina</i> , -54.70090000000, -<br>2.45060000000  | GBIF | <a href="https://doi.org/10.15468/dl.t653n6">https://doi.org/10.15468/dl.t653n6</a> |
| <i>A.serpentina</i> , -51.92530000000, -<br>14.23500000000 | GBIF | <a href="https://doi.org/10.15468/dl.t653n6">https://doi.org/10.15468/dl.t653n6</a> |
| <i>A.serpentina</i> , -42.00000000000, -<br>11.00000000000 | GBIF | <a href="https://doi.org/10.15468/dl.t653n6">https://doi.org/10.15468/dl.t653n6</a> |

|                                                             |      |                                                                                                                                       |
|-------------------------------------------------------------|------|---------------------------------------------------------------------------------------------------------------------------------------|
| <i>A.serpentina</i> , -55.000000000000,-<br>10.000000000000 | CABI | <a href="https://www.cabidigitallibrary.org">https://www.cabidigitallibrary.org</a> (last access March 3, 2022 CABI 1934-2021 - 5665) |
| <i>A.serpentina</i> , -<br>52.000000000000, 1.000000000000  | CABI | <a href="https://www.cabidigitallibrary.org">https://www.cabidigitallibrary.org</a> (last access March 3, 2022 CABI 1934-2021 - 5665) |
| <i>A.serpentina</i> , -64.500000000000,-<br>3.750000000000  | CABI | <a href="https://www.cabidigitallibrary.org">https://www.cabidigitallibrary.org</a> (last access March 3, 2022 CABI 1934-2021 - 5665) |
| <i>A.serpentina</i> , -42.000000000000,-<br>12.000000000000 | CABI | <a href="https://www.cabidigitallibrary.org">https://www.cabidigitallibrary.org</a> (last access March 3, 2022 CABI 1934-2021 - 5665) |
| <i>A.serpentina</i> , -40.750000000000,-<br>20.000000000000 | CABI | <a href="https://www.cabidigitallibrary.org">https://www.cabidigitallibrary.org</a> (last access March 3, 2022 CABI 1934-2021 - 5665) |
| <i>A.serpentina</i> , -49.636230000000,-<br>15.580710000000 | CABI | <a href="https://www.cabidigitallibrary.org">https://www.cabidigitallibrary.org</a> (last access March 3, 2022 CABI 1934-2021 - 5665) |
| <i>A.serpentina</i> , -45.000000000000,-<br>5.000000000000  | CABI | <a href="https://www.cabidigitallibrary.org">https://www.cabidigitallibrary.org</a> (last access March 3, 2022 CABI 1934-2021 - 5665) |
| <i>A.serpentina</i> , -55.000000000000,-<br>20.500000000000 | CABI | <a href="https://www.cabidigitallibrary.org">https://www.cabidigitallibrary.org</a> (last access March 3, 2022 CABI 1934-2021 - 5665) |
| <i>A.serpentina</i> , -44.000000000000,-<br>18.000000000000 | CABI | <a href="https://www.cabidigitallibrary.org">https://www.cabidigitallibrary.org</a> (last access March 3, 2022 CABI 1934-2021 - 5665) |
| <i>A.serpentina</i> , -53.000000000000,-<br>4.000000000000  | CABI | <a href="https://www.cabidigitallibrary.org">https://www.cabidigitallibrary.org</a> (last access March 3, 2022 CABI 1934-2021 - 5665) |
| <i>A.serpentina</i> , -36.500000000000,-<br>7.250000000000  | CABI | <a href="https://www.cabidigitallibrary.org">https://www.cabidigitallibrary.org</a> (last access March 3, 2022 CABI 1934-2021 - 5665) |
| <i>A.serpentina</i> , -51.333330000000,-<br>24.500000000000 | CABI | <a href="https://www.cabidigitallibrary.org">https://www.cabidigitallibrary.org</a> (last access March 3, 2022 CABI 1934-2021 - 5665) |
| <i>A.serpentina</i> , -37.750000000000,-<br>8.333330000000  | CABI | <a href="https://www.cabidigitallibrary.org">https://www.cabidigitallibrary.org</a> (last access March 3, 2022 CABI 1934-2021 - 5665) |
| <i>A.serpentina</i> , -42.333330000000,-<br>7.250000000000  | CABI | <a href="https://www.cabidigitallibrary.org">https://www.cabidigitallibrary.org</a> (last access March 3, 2022 CABI 1934-2021 - 5665) |
| <i>A.serpentina</i> , -42.500000000000,-<br>22.250000000000 | CABI | <a href="https://www.cabidigitallibrary.org">https://www.cabidigitallibrary.org</a> (last access March 3, 2022 CABI 1934-2021 - 5665) |
| <i>A.serpentina</i> , -36.500000000000,-<br>5.750000000000  | CABI | <a href="https://www.cabidigitallibrary.org">https://www.cabidigitallibrary.org</a> (last access March 3, 2022 CABI 1934-2021 - 5665) |
| <i>A.serpentina</i> , -53.500000000000,-<br>30.000000000000 | CABI | <a href="https://www.cabidigitallibrary.org">https://www.cabidigitallibrary.org</a> (last access March 3, 2022 CABI 1934-2021 - 5665) |
| <i>A.serpentina</i> , -63.000000000000,-<br>11.000000000000 | CABI | <a href="https://www.cabidigitallibrary.org">https://www.cabidigitallibrary.org</a> (last access March 3, 2022 CABI 1934-2021 - 5665) |
| <i>A.serpentina</i> , -<br>61.250000000000, 2.250000000000  | CABI | <a href="https://www.cabidigitallibrary.org">https://www.cabidigitallibrary.org</a> (last access March 3, 2022 CABI 1934-2021 - 5665) |
| <i>A.serpentina</i> , -50.000000000000,-<br>27.000000000000 | CABI | <a href="https://www.cabidigitallibrary.org">https://www.cabidigitallibrary.org</a> (last access March 3, 2022 CABI 1934-2021 - 5665) |

|                                                          |      |                                                                                                                                       |
|----------------------------------------------------------|------|---------------------------------------------------------------------------------------------------------------------------------------|
| <i>A.serpentina</i> , -49.000000000000, -22.000000000000 | CABI | <a href="https://www.cabidigitallibrary.org">https://www.cabidigitallibrary.org</a> (last access March 3, 2022 CABI 1934-2021 - 5665) |
| <i>A.serpentina</i> , -48.000000000000, -10.500000000000 | CABI | <a href="https://www.cabidigitallibrary.org">https://www.cabidigitallibrary.org</a> (last access March 3, 2022 CABI 1934-2021 - 5665) |
| <i>A.serpentina</i> , -79.389999000000, -0.080000000000  | GBIF | <a href="https://doi.org/10.15468/dl.t653n6">https://doi.org/10.15468/dl.t653n6</a>                                                   |
| <i>A.serpentina</i> , -78.250000000000, -1.250000000000  | CABI | <a href="https://www.cabidigitallibrary.org">https://www.cabidigitallibrary.org</a> (last access March 3, 2022 CABI 1934-2021 - 5665) |
| <i>A.serpentina</i> , -80.110001000000, 8.390000000000   | GBIF | <a href="https://doi.org/10.15468/dl.t653n6">https://doi.org/10.15468/dl.t653n6</a>                                                   |
| <i>A.serpentina</i> , -79.516700000000, 8.983300000000   | GBIF | <a href="https://doi.org/10.15468/dl.t653n6">https://doi.org/10.15468/dl.t653n6</a>                                                   |
| <i>A.serpentina</i> , -80.000000000000, 9.000000000000   | CABI | <a href="https://www.cabidigitallibrary.org">https://www.cabidigitallibrary.org</a> (last access March 3, 2022 CABI 1934-2021 - 5665) |
| <i>A.serpentina</i> , -76.605300000000, 3.117100000000   | GBIF | <a href="https://doi.org/10.15468/dl.t653n6">https://doi.org/10.15468/dl.t653n6</a>                                                   |
| <i>A.serpentina</i> , -73.250000000000, 4.000000000000   | CABI | <a href="https://www.cabidigitallibrary.org">https://www.cabidigitallibrary.org</a> (last access March 3, 2022 CABI 1934-2021 - 5665) |
| <i>A.serpentina</i> , -58.420200000000, 6.860300000000   | GBIF | <a href="https://doi.org/10.15468/dl.t653n6">https://doi.org/10.15468/dl.t653n6</a>                                                   |
| <i>A.serpentina</i> , -59.399800000000, 3.207000000000   | GBIF | <a href="https://doi.org/10.15468/dl.t653n6">https://doi.org/10.15468/dl.t653n6</a>                                                   |
| <i>A.serpentina</i> , -59.000000000000, 5.000000000000   | CABI | <a href="https://www.cabidigitallibrary.org">https://www.cabidigitallibrary.org</a> (last access March 3, 2022 CABI 1934-2021 - 5665) |
| <i>A.serpentina</i> , -53.000000000000, 4.000000000000   | CABI | <a href="https://www.cabidigitallibrary.org">https://www.cabidigitallibrary.org</a> (last access March 3, 2022 CABI 1934-2021 - 5665) |
| <i>A.serpentina</i> , -88.750000000000, 17.250000000000  | CABI | <a href="https://www.cabidigitallibrary.org">https://www.cabidigitallibrary.org</a> (last access March 3, 2022 CABI 1934-2021 - 5665) |
| <i>A.serpentina</i> , -88.916670000000, 13.833330000000  | CABI | <a href="https://www.cabidigitallibrary.org">https://www.cabidigitallibrary.org</a> (last access March 3, 2022 CABI 1934-2021 - 5665) |
| <i>A.serpentina</i> , -90.250000000000, 15.500000000000  | CABI | <a href="https://www.cabidigitallibrary.org">https://www.cabidigitallibrary.org</a> (last access March 3, 2022 CABI 1934-2021 - 5665) |
| <i>A.serpentina</i> , -86.500000000000, 15.000000000000  | CABI | <a href="https://www.cabidigitallibrary.org">https://www.cabidigitallibrary.org</a> (last access March 3, 2022 CABI 1934-2021 - 5665) |
| <i>A.serpentina</i> , -85.000000000000, 13.000000000000  | CABI | <a href="https://www.cabidigitallibrary.org">https://www.cabidigitallibrary.org</a> (last access March 3, 2022 CABI 1934-2021 - 5665) |
| <i>A.serpentina</i> , -58.000000000000, -23.333330000000 | CABI | <a href="https://www.cabidigitallibrary.org">https://www.cabidigitallibrary.org</a> (last access March 3, 2022 CABI 1934-2021 - 5665) |
| <i>A.serpentina</i> , -75.250000000000, -10.000000000000 | CABI | <a href="https://www.cabidigitallibrary.org">https://www.cabidigitallibrary.org</a> (last access March 3, 2022 CABI 1934-2021 - 5665) |

|                                                           |         |                                                                                                                                       |                                                            |
|-----------------------------------------------------------|---------|---------------------------------------------------------------------------------------------------------------------------------------|------------------------------------------------------------|
| <i>A. serpentina</i> , -56.000000000000, 4.000000000000   | CABI    | <a href="https://www.cabidigitallibrary.org">https://www.cabidigitallibrary.org</a> (last access March 3, 2022 CABI 1934-2021 - 5665) |                                                            |
| <i>A. serpentina</i> , -66.000000000000, 8.000000000000   | CABI    | <a href="https://www.cabidigitallibrary.org">https://www.cabidigitallibrary.org</a> (last access March 3, 2022 CABI 1934-2021 - 5665) |                                                            |
| <i>A. serpentina</i> , -79.681318000000, 9.303518000000   | GBIF    | <a href="https://doi.org/10.15468/dl.t653n6">https://doi.org/10.15468/dl.t653n6</a>                                                   |                                                            |
| <i>A. serpentina</i> , -80.414227000000, 8.634641000000   | GBIF    | <a href="https://doi.org/10.15468/dl.t653n6">https://doi.org/10.15468/dl.t653n6</a>                                                   |                                                            |
| <i>A. serpentina</i> , -80.530706000000, 8.359579000000   | GBIF    | <a href="https://doi.org/10.15468/dl.t653n6">https://doi.org/10.15468/dl.t653n6</a>                                                   |                                                            |
| <i>A. serpentina</i> , -82.614582000000, 9.492344000000   | GBIF    | <a href="https://doi.org/10.15468/dl.t653n6">https://doi.org/10.15468/dl.t653n6</a>                                                   |                                                            |
| <i>A. serpentina</i> , -39.101100000000, -12.661000000000 | SPECIES | <a href="http://www.splink.org.br/">http://www.splink.org.br/</a>                                                                     | speciesLink network, 16-Jun-2022 12:21, specieslink.net/se |
| <i>A. serpentina</i> , -65.137925000000, -26.687858000000 | GBIF    | <a href="https://doi.org/10.15468/dl.t653n6">https://doi.org/10.15468/dl.t653n6</a>                                                   |                                                            |
| <i>A. serpentina</i> , -63.806003000000, -22.517531000000 | GBIF    | <a href="https://doi.org/10.15468/dl.t653n6">https://doi.org/10.15468/dl.t653n6</a>                                                   |                                                            |
| <i>A. obliqua</i> , -84.13, 9.39                          | GBIF    | <a href="https://doi.org/10.15468/dl.93h5p7">https://doi.org/10.15468/dl.93h5p7</a>                                                   |                                                            |
| <i>A. obliqua</i> , -85.35, 10.35                         | GBIF    | <a href="https://doi.org/10.15468/dl.93h5p7">https://doi.org/10.15468/dl.93h5p7</a>                                                   |                                                            |
| <i>A. obliqua</i> , -84.99, 10.61                         | GBIF    | <a href="https://doi.org/10.15468/dl.93h5p7">https://doi.org/10.15468/dl.93h5p7</a>                                                   |                                                            |
| <i>A. obliqua</i> , -85.06, 9.87                          | GBIF    | <a href="https://doi.org/10.15468/dl.93h5p7">https://doi.org/10.15468/dl.93h5p7</a>                                                   |                                                            |
| <i>A. obliqua</i> , -85.73, 10.90                         | GBIF    | <a href="https://doi.org/10.15468/dl.93h5p7">https://doi.org/10.15468/dl.93h5p7</a>                                                   |                                                            |
| <i>A. obliqua</i> , -85.35, 10.78                         | GBIF    | <a href="https://doi.org/10.15468/dl.93h5p7">https://doi.org/10.15468/dl.93h5p7</a>                                                   |                                                            |
| <i>A. obliqua</i> , -84.41, 9.97                          | GBIF    | <a href="https://doi.org/10.15468/dl.93h5p7">https://doi.org/10.15468/dl.93h5p7</a>                                                   |                                                            |
| <i>A. obliqua</i> , -84.00, 10.00                         | CABI    | <a href="https://www.cabidigitallibrary.org">https://www.cabidigitallibrary.org</a> (Last access March 3, 2022 CABI 1935-2019 - 5659) |                                                            |
| <i>A. obliqua</i> , -47.81, -21.17                        | GBIF    | <a href="https://doi.org/10.15468/dl.93h5p7">https://doi.org/10.15468/dl.93h5p7</a>                                                   |                                                            |
| <i>A. obliqua</i> , -49.53, -25.46                        | GBIF    | <a href="https://doi.org/10.15468/dl.93h5p7">https://doi.org/10.15468/dl.93h5p7</a>                                                   |                                                            |
| <i>A. obliqua</i> , -49.06, -25.44                        | GBIF    | <a href="https://doi.org/10.15468/dl.93h5p7">https://doi.org/10.15468/dl.93h5p7</a>                                                   |                                                            |

|                                    |      |                                                                                                                                       |
|------------------------------------|------|---------------------------------------------------------------------------------------------------------------------------------------|
| <i>A. obliqua</i> , -38.45, -5.13  | GBIF | <a href="https://doi.org/10.15468/dl.93h5p7">https://doi.org/10.15468/dl.93h5p7</a>                                                   |
| <i>A. obliqua</i> , -38.46, -12.97 | GBIF | <a href="https://doi.org/10.15468/dl.93h5p7">https://doi.org/10.15468/dl.93h5p7</a>                                                   |
| <i>A. obliqua</i> , -55.00, -10.00 | CABI | <a href="https://www.cabidigitallibrary.org">https://www.cabidigitallibrary.org</a> (Last access March 3, 2022 CABI 1935-2019 - 5659) |
| <i>A. obliqua</i> , -70.00, -9.00  | CABI | <a href="https://www.cabidigitallibrary.org">https://www.cabidigitallibrary.org</a> (Last access March 3, 2022 CABI 1935-2019 - 5659) |
| <i>A. obliqua</i> , -36.42, -9.58  | CABI | <a href="https://www.cabidigitallibrary.org">https://www.cabidigitallibrary.org</a> (Last access March 3, 2022 CABI 1935-2019 - 5659) |
| <i>A. obliqua</i> , -52.00, 1.00   | CABI | <a href="https://www.cabidigitallibrary.org">https://www.cabidigitallibrary.org</a> (Last access March 3, 2022 CABI 1935-2019 - 5659) |
| <i>A. obliqua</i> , -64.50, -3.75  | CABI | <a href="https://www.cabidigitallibrary.org">https://www.cabidigitallibrary.org</a> (Last access March 3, 2022 CABI 1935-2019 - 5659) |
| <i>A. obliqua</i> , -42.00, -12.00 | CABI | <a href="https://www.cabidigitallibrary.org">https://www.cabidigitallibrary.org</a> (Last access March 3, 2022 CABI 1935-2019 - 5659) |
| <i>A. obliqua</i> , -39.50, -5.00  | CABI | <a href="https://www.cabidigitallibrary.org">https://www.cabidigitallibrary.org</a> (Last access March 3, 2022 CABI 1935-2019 - 5659) |
| <i>A. obliqua</i> , -47.75, -15.75 | CABI | <a href="https://www.cabidigitallibrary.org">https://www.cabidigitallibrary.org</a> (Last access March 3, 2022 CABI 1935-2019 - 5659) |
| <i>A. obliqua</i> , -40.75, -20.00 | CABI | <a href="https://www.cabidigitallibrary.org">https://www.cabidigitallibrary.org</a> (Last access March 3, 2022 CABI 1935-2019 - 5659) |
| <i>A. obliqua</i> , -49.64, -15.58 | CABI | <a href="https://www.cabidigitallibrary.org">https://www.cabidigitallibrary.org</a> (Last access March 3, 2022 CABI 1935-2019 - 5659) |
| <i>A. obliqua</i> , -45.00, -5.00  | CABI | <a href="https://www.cabidigitallibrary.org">https://www.cabidigitallibrary.org</a> (Last access March 3, 2022 CABI 1935-2019 - 5659) |
| <i>A. obliqua</i> , -56.00, -13.00 | CABI | <a href="https://www.cabidigitallibrary.org">https://www.cabidigitallibrary.org</a> (Last access March 3, 2022 CABI 1935-2019 - 5659) |
| <i>A. obliqua</i> , -55.00, -20.50 | CABI | <a href="https://www.cabidigitallibrary.org">https://www.cabidigitallibrary.org</a> (Last access March 3, 2022 CABI 1935-2019 - 5659) |
| <i>A. obliqua</i> , -44.00, -18.00 | CABI | <a href="https://www.cabidigitallibrary.org">https://www.cabidigitallibrary.org</a> (Last access March 3, 2022 CABI 1935-2019 - 5659) |
| <i>A. obliqua</i> , -53.00, -4.00  | CABI | <a href="https://www.cabidigitallibrary.org">https://www.cabidigitallibrary.org</a> (Last access March 3, 2022 CABI 1935-2019 - 5659) |
| <i>A. obliqua</i> , -36.50, -7.25  | CABI | <a href="https://www.cabidigitallibrary.org">https://www.cabidigitallibrary.org</a> (Last access March 3, 2022 CABI 1935-2019 - 5659) |
| <i>A. obliqua</i> , -51.33, -24.50 | CABI | <a href="https://www.cabidigitallibrary.org">https://www.cabidigitallibrary.org</a> (Last access March 3, 2022 CABI 1935-2019 - 5659) |
| <i>A. obliqua</i> , -37.75, -8.33  | CABI | <a href="https://www.cabidigitallibrary.org">https://www.cabidigitallibrary.org</a> (Last access March 3, 2022 CABI 1935-2019 - 5659) |



|                                    |      |                                                                                                                                       |
|------------------------------------|------|---------------------------------------------------------------------------------------------------------------------------------------|
| <i>A. obliqua</i> , -42.33, -7.25  | CABI | <a href="https://www.cabidigitallibrary.org">https://www.cabidigitallibrary.org</a> (Last access March 3, 2022 CABI 1935-2019 - 5659) |
| <i>A. obliqua</i> , -42.50, -22.25 | CABI | <a href="https://www.cabidigitallibrary.org">https://www.cabidigitallibrary.org</a> (Last access March 3, 2022 CABI 1935-2019 - 5659) |
| <i>A. obliqua</i> , -36.50, -5.75  | CABI | <a href="https://www.cabidigitallibrary.org">https://www.cabidigitallibrary.org</a> (Last access March 3, 2022 CABI 1935-2019 - 5659) |
| <i>A. obliqua</i> , -53.50, -30.00 | CABI | <a href="https://www.cabidigitallibrary.org">https://www.cabidigitallibrary.org</a> (Last access March 3, 2022 CABI 1935-2019 - 5659) |
| <i>A. obliqua</i> , -63.00, -11.00 | CABI | <a href="https://www.cabidigitallibrary.org">https://www.cabidigitallibrary.org</a> (Last access March 3, 2022 CABI 1935-2019 - 5659) |
| <i>A. obliqua</i> , -61.25, 2.25   | CABI | <a href="https://www.cabidigitallibrary.org">https://www.cabidigitallibrary.org</a> (Last access March 3, 2022 CABI 1935-2019 - 5659) |
| <i>A. obliqua</i> , -50.00, -27.00 | CABI | <a href="https://www.cabidigitallibrary.org">https://www.cabidigitallibrary.org</a> (Last access March 3, 2022 CABI 1935-2019 - 5659) |
| <i>A. obliqua</i> , -49.00, -22.00 | CABI | <a href="https://www.cabidigitallibrary.org">https://www.cabidigitallibrary.org</a> (Last access March 3, 2022 CABI 1935-2019 - 5659) |
| <i>A. obliqua</i> , -48.00, -10.50 | CABI | <a href="https://www.cabidigitallibrary.org">https://www.cabidigitallibrary.org</a> (Last access March 3, 2022 CABI 1935-2019 - 5659) |
| <i>A. obliqua</i> , -73.25, 4.00   | CABI | <a href="https://www.cabidigitallibrary.org">https://www.cabidigitallibrary.org</a> (Last access March 3, 2022 CABI 1935-2019 - 5659) |
| <i>A. obliqua</i> , -76.57, 3.37   | GBIF | <a href="https://doi.org/10.15468/dl.93h5p7">https://doi.org/10.15468/dl.93h5p7</a>                                                   |
| <i>A. obliqua</i> , -76.95, 4.25   | GBIF | <a href="https://doi.org/10.15468/dl.93h5p7">https://doi.org/10.15468/dl.93h5p7</a>                                                   |
| <i>A. obliqua</i> , -76.52, 2.93   | GBIF | <a href="https://doi.org/10.15468/dl.93h5p7">https://doi.org/10.15468/dl.93h5p7</a>                                                   |
| <i>A. obliqua</i> , -75.61, 4.99   | GBIF | <a href="https://doi.org/10.15468/dl.93h5p7">https://doi.org/10.15468/dl.93h5p7</a>                                                   |
| <i>A. obliqua</i> , -76.09, 4.55   | GBIF | <a href="https://doi.org/10.15468/dl.93h5p7">https://doi.org/10.15468/dl.93h5p7</a>                                                   |
| <i>A. obliqua</i> , -76.78, 3.58   | GBIF | <a href="https://doi.org/10.15468/dl.93h5p7">https://doi.org/10.15468/dl.93h5p7</a>                                                   |
| <i>A. obliqua</i> , -76.33, 3.51   | GBIF | <a href="https://doi.org/10.15468/dl.93h5p7">https://doi.org/10.15468/dl.93h5p7</a>                                                   |
| <i>A. obliqua</i> , -75.95, 4.25   | GBIF | <a href="https://doi.org/10.15468/dl.93h5p7">https://doi.org/10.15468/dl.93h5p7</a>                                                   |
| <i>A. obliqua</i> , -74.31, 3.68   | GBIF | <a href="https://doi.org/10.15468/dl.93h5p7">https://doi.org/10.15468/dl.93h5p7</a>                                                   |
| <i>A. obliqua</i> , -75.58, 6.19   | GBIF | <a href="https://doi.org/10.15468/dl.93h5p7">https://doi.org/10.15468/dl.93h5p7</a>                                                   |

|                                    |      |                                                                                                                                       |
|------------------------------------|------|---------------------------------------------------------------------------------------------------------------------------------------|
| <i>A. obliqua</i> , -58.00, -23.33 | CABI | <a href="https://www.cabidigitallibrary.org">https://www.cabidigitallibrary.org</a> (Last access March 3, 2022 CABI 1935-2019 - 5659) |
| <i>A. obliqua</i> , -75.25, -10.00 | CABI | <a href="https://www.cabidigitallibrary.org">https://www.cabidigitallibrary.org</a> (Last access March 3, 2022 CABI 1935-2019 - 5659) |
| <i>A. obliqua</i> , -70.09, -12.56 | GBIF | <a href="https://doi.org/10.15468/dl.93h5p7">https://doi.org/10.15468/dl.93h5p7</a>                                                   |
| <i>A. obliqua</i> , -80.00, 9.00   | CABI | <a href="https://www.cabidigitallibrary.org">https://www.cabidigitallibrary.org</a> (Last access March 3, 2022 CABI 1935-2019 - 5659) |
| <i>A. obliqua</i> , -79.39, 9.14   | GBIF | <a href="https://doi.org/10.15468/dl.93h5p7">https://doi.org/10.15468/dl.93h5p7</a>                                                   |
| <i>A. obliqua</i> , -63.65, -17.50 | GBIF | <a href="https://doi.org/10.15468/dl.93h5p7">https://doi.org/10.15468/dl.93h5p7</a>                                                   |
| <i>A. obliqua</i> , -64.54, -17.20 | GBIF | <a href="https://doi.org/10.15468/dl.93h5p7">https://doi.org/10.15468/dl.93h5p7</a>                                                   |
| <i>A. obliqua</i> , -102.00, 23.00 | CABI | <a href="https://www.cabidigitallibrary.org">https://www.cabidigitallibrary.org</a> (Last access March 3, 2022 CABI 1935-2019 - 5659) |
| <i>A. obliqua</i> , -91.51, 18.21  | GBIF | <a href="https://doi.org/10.15468/dl.93h5p7">https://doi.org/10.15468/dl.93h5p7</a>                                                   |
| <i>A. obliqua</i> , -90.64, 18.58  | GBIF | <a href="https://doi.org/10.15468/dl.93h5p7">https://doi.org/10.15468/dl.93h5p7</a>                                                   |
| <i>A. obliqua</i> , -95.17, 18.50  | GBIF | <a href="https://doi.org/10.15468/dl.93h5p7">https://doi.org/10.15468/dl.93h5p7</a>                                                   |
| <i>A. obliqua</i> , -98.96, 21.72  | GBIF | <a href="https://doi.org/10.15468/dl.93h5p7">https://doi.org/10.15468/dl.93h5p7</a>                                                   |
| <i>A. obliqua</i> , -94.19, 16.31  | GBIF | <a href="https://doi.org/10.15468/dl.93h5p7">https://doi.org/10.15468/dl.93h5p7</a>                                                   |
| <i>A. obliqua</i> , -97.84, 22.23  | GBIF | <a href="https://doi.org/10.15468/dl.93h5p7">https://doi.org/10.15468/dl.93h5p7</a>                                                   |
| <i>A. obliqua</i> , -88.75, 17.25  | CABI | <a href="https://www.cabidigitallibrary.org">https://www.cabidigitallibrary.org</a> (Last access March 3, 2022 CABI 1935-2019 - 5659) |
| <i>A. obliqua</i> , -88.92, 13.83  | CABI | <a href="https://www.cabidigitallibrary.org">https://www.cabidigitallibrary.org</a> (Last access March 3, 2022 CABI 1935-2019 - 5659) |
| <i>A. obliqua</i> , -90.25, 15.50  | CABI | <a href="https://www.cabidigitallibrary.org">https://www.cabidigitallibrary.org</a> (Last access March 3, 2022 CABI 1935-2019 - 5659) |
| <i>A. obliqua</i> , -86.50, 15.00  | CABI | <a href="https://www.cabidigitallibrary.org">https://www.cabidigitallibrary.org</a> (Last access March 3, 2022 CABI 1935-2019 - 5659) |
| <i>A. obliqua</i> , -85.00, 13.00  | CABI | <a href="https://www.cabidigitallibrary.org">https://www.cabidigitallibrary.org</a> (Last access March 3, 2022 CABI 1935-2019 - 5659) |
| <i>A. obliqua</i> , -78.25, -1.25  | CABI | <a href="https://www.cabidigitallibrary.org">https://www.cabidigitallibrary.org</a> (Last access March 3, 2022 CABI 1935-2019 - 5659) |

|                                                   |         |                                                                                                                                       |
|---------------------------------------------------|---------|---------------------------------------------------------------------------------------------------------------------------------------|
| <i>A. obliqua</i> , -53.00,4.00                   | CABI    | <a href="https://www.cabidigitallibrary.org">https://www.cabidigitallibrary.org</a> (Last access March 3, 2022 CABI 1935-2019 - 5659) |
| <i>A. obliqua</i> , -59.00,5.00                   | CABI    | <a href="https://www.cabidigitallibrary.org">https://www.cabidigitallibrary.org</a> (Last access March 3, 2022 CABI 1935-2019 - 5659) |
| <i>A. obliqua</i> , -56.00,4.00                   | CABI    | <a href="https://www.cabidigitallibrary.org">https://www.cabidigitallibrary.org</a> (Last access March 3, 2022 CABI 1935-2019 - 5659) |
| <i>A. obliqua</i> , -66.00,8.00                   | CABI    | <a href="https://www.cabidigitallibrary.org">https://www.cabidigitallibrary.org</a> (Last access March 3, 2022 CABI 1935-2019 - 5659) |
| <i>A. obliqua</i> , -77.80,8.35                   | SV      | <a href="https://mida.gob.pa/sanidad-vegetal">https://mida.gob.pa/sanidad-vegetal</a> (Last access March 10, 2022)                    |
| <i>A. obliqua</i> , -78.06,8.59                   | CABI    | <a href="https://www.cabidigitallibrary.org">https://www.cabidigitallibrary.org</a> (Last access March 3, 2022 CABI 1935-2019 - 5659) |
| <i>A. obliqua</i> , -78.19,8.83                   | SV      | <a href="https://mida.gob.pa/sanidad-vegetal">https://mida.gob.pa/sanidad-vegetal</a> (Last access March 10, 2022)                    |
| <i>A. obliqua</i> , -79.71,9.26                   | GBIF    | <a href="https://doi.org/10.15468/dl.93h5p7">https://doi.org/10.15468/dl.93h5p7</a>                                                   |
| <i>A. obliqua</i> , -80.23,8.38                   | SV      | <a href="https://mida.gob.pa/sanidad-vegetal">https://mida.gob.pa/sanidad-vegetal</a> (Last access March 10, 2022)                    |
| <i>A. obliqua</i> , -80.23,8.72                   | SV      | <a href="https://mida.gob.pa/sanidad-vegetal">https://mida.gob.pa/sanidad-vegetal</a> (Last access March 10, 2022)                    |
| <i>A. obliqua</i> , -80.42,7.67                   | SV      | <a href="https://mida.gob.pa/sanidad-vegetal">https://mida.gob.pa/sanidad-vegetal</a> (Last access March 10, 2022)                    |
| <i>A. obliqua</i> , -80.49,8.63                   | SV      | <a href="https://mida.gob.pa/sanidad-vegetal">https://mida.gob.pa/sanidad-vegetal</a> (Last access March 10, 2022)                    |
| <i>A. obliqua</i> , -80.62,8.12                   | SV      | <a href="https://mida.gob.pa/sanidad-vegetal">https://mida.gob.pa/sanidad-vegetal</a> (Last access March 10, 2022)                    |
| <i>A. obliqua</i> , -80.75,7.85                   | SV      | <a href="https://mida.gob.pa/sanidad-vegetal">https://mida.gob.pa/sanidad-vegetal</a> (Last access March 10, 2022)                    |
| <i>A. obliqua</i> , -80.75,8.44                   | SV      | <a href="https://mida.gob.pa/sanidad-vegetal">https://mida.gob.pa/sanidad-vegetal</a> (Last access March 10, 2022)                    |
| <i>A. obliqua</i> , -82.17,8.87                   | SV      | <a href="https://mida.gob.pa/sanidad-vegetal">https://mida.gob.pa/sanidad-vegetal</a> (Last access March 10, 2022)                    |
| <i>A. obliqua</i> , -82.51,8.65                   | SV      | <a href="https://mida.gob.pa/sanidad-vegetal">https://mida.gob.pa/sanidad-vegetal</a> (Last access March 10, 2022)                    |
| <i>A. obliqua</i> , -82.52,9.45                   | SV      | <a href="https://mida.gob.pa/sanidad-vegetal">https://mida.gob.pa/sanidad-vegetal</a> (Last access March 10, 2022)                    |
| <i>A. obliqua</i> , -82.87,9.59                   | GBIF    | <a href="https://doi.org/10.15468/dl.93h5p7">https://doi.org/10.15468/dl.93h5p7</a>                                                   |
| <i>A. obliqua</i> , -50.58,-29.45                 | SPECI   | speciesLink network, 16-Jun-2022                                                                                                      |
|                                                   | ES      | <a href="http://www.splink.org.br/">http://www.splink.org.br/</a> 12:51, specieslink.net/search                                       |
|                                                   | SPECI   | speciesLink network, 16-Jun-2022                                                                                                      |
| <i>A. obliqua</i> , -58.01,-28.59                 | ES      | <a href="http://www.splink.org.br/">http://www.splink.org.br/</a> 12:51, specieslink.net/search                                       |
|                                                   | SPECI   | speciesLink network, 16-Jun-2022                                                                                                      |
| <i>A. obliqua</i> , -65.43,-24.04                 | ES      | <a href="http://www.splink.org.br/">http://www.splink.org.br/</a> 12:51, specieslink.net/search                                       |
| <i>A. striata</i> , -75.08032200000,6.90975700000 | Colecci | ón: 2007_Giraldo_Monitoramento de moscas-das-frutas (Diptera, Tephritidae, Anastrepha).                                               |
| <i>A. striata</i> , -75.45490300000,6.37931600000 | Colecci | ón: 2007_Giraldo_Monitoramento de moscas-das-frutas (Diptera, Tephritidae, Anastrepha)                                                |

|                               |                                                                                          |
|-------------------------------|------------------------------------------------------------------------------------------|
| <i>A.striata,-</i>            | Colecci                                                                                  |
| 75.03629300000,6.30765200000  | ón: 2007_Giraldó_Monitoramento de moscas-das-frutas (Diptera, Tephritidae, Anastrepha).  |
| <i>A.striata,-</i>            | Colecci                                                                                  |
| 75.82992600000,6.56398000000  | ón: 2007_Giraldó_Monitoramento de moscas-das-frutas (Diptera, Tephritidae, Anastrepha).  |
| <i>A.striata,-</i>            | Colecci                                                                                  |
| 75.46661400000,6.65246000000  | ón: 2007_Giraldó_Monitoramento de moscas-das-frutas (Diptera, Tephritidae, Anastrepha).  |
| <i>A.striata,-</i>            | Colecci                                                                                  |
| 76.88667300000,6.59695800000  | ón: 2007_Giraldó_Monitoramento de moscas-das-frutas (Diptera, Tephritidae, Anastrepha).  |
| <i>A.striata,-</i>            | Colecci                                                                                  |
| 75.01644100000,6.59905200000  | ón: 2007_Giraldó_Monitoramento de moscas-das-frutas (Diptera, Tephritidae, Anastrepha).  |
| <i>A.striata,-</i>            | Colecci                                                                                  |
| 75.54995300000,2.38863200000  | ón: 2007_Giraldó_Monitoramento de moscas-das-frutas (Diptera, Tephritidae, Anastrepha).  |
| <i>A.striata,-</i>            | Colecci                                                                                  |
| 74.20185400000,11.23678600000 | ón: 2007_Giraldó_Monitoramento de moscas-das-frutas (Diptera, Tephritidae, Anastrepha).  |
| <i>A.striata,-</i>            | Colecci                                                                                  |
| 73.62168900000,4.13315000000  | ón: 2007_Giraldó_Monitoramento de moscas-das-frutas (Diptera, Tephritidae, Anastrepha).  |
| <i>A.striata,-</i>            | Colecci                                                                                  |
| 72.50716200000,7.91092700000  | ón: 2007_Giraldó_Monitoramento de moscas-das-frutas (Diptera, Tephritidae, Anastrepha).  |
| <i>A.striata,-</i>            | Colecci                                                                                  |
| 72.47909000000,7.57827200000  | ón: 2007_Giraldó_Monitoramento de moscas-das-frutas (Diptera, Tephritidae, Anastrepha).  |
| <i>A.striata,-</i>            | Colecci                                                                                  |
| 74.88671600000,4.15247500000  | ón: 2007_Giraldó_Monitoramento de moscas-das-frutas (Diptera, Tephritidae, Anastrepha).  |
| <i>A.striata,-</i>            | Colecci                                                                                  |
| 74.88974100000,5.20459700000  | ón: 2012_ sarmiento C.E. et al_ Anastrepha (DIPTERA: TEPHRITIDAE) Y SUS ASOCIADOS:       |
| <i>A.striata,-</i>            | Colecci                                                                                  |
| 73.36799200000,5.07547500000  | ón: 2012_ sarmiento C.E. et al_ Anastrepha (DIPTERA: TEPHRITIDAE) Y SUS ASOCIADOS:       |
| <i>A.striata,-</i>            | Colecci                                                                                  |
| 72.68598600000,6.33493400000  | ón: 2012_ sarmiento C.E. et al_ Anastrepha (DIPTERA: TEPHRITIDAE) Y SUS ASOCIADOS:       |
| <i>A.striata,-</i>            | Colecci                                                                                  |
| 74.09611100000,4.64805600000  | ón: 2012_ sarmiento C.E. et al_ Anastrepha (DIPTERA: TEPHRITIDAE) Y SUS ASOCIADOS:       |
| <i>A.striata,-</i>            | Colecci                                                                                  |
| 73.94940400000,4.40363900000  | ón: 2012_ sarmiento C.E. et al_ Anastrepha (DIPTERA: TEPHRITIDAE) Y SUS ASOCIADOS:       |
| <i>A.striata,-</i>            |                                                                                          |
| 74.39249200000,4.65674000000  | GBIF <a href="https://doi.org/10.15468/dl.frjaxe">https://doi.org/10.15468/dl.frjaxe</a> |
| <i>A.striata,-</i>            |                                                                                          |
| 76.29824600000,3.53975400000  | GBIF <a href="https://doi.org/10.15468/dl.frjaxe">https://doi.org/10.15468/dl.frjaxe</a> |
| <i>A.striata,-</i>            | Colecci                                                                                  |
| 75.93386900000,4.26920500000  | ón: 2012_ sarmiento C.E. et al_ Anastrepha (DIPTERA: TEPHRITIDAE) Y SUS ASOCIADOS:       |
| <i>A.striata,-</i>            |                                                                                          |
| 76.19892100000,4.08682000000  | GBIF <a href="https://doi.org/10.15468/dl.frjaxe">https://doi.org/10.15468/dl.frjaxe</a> |

|                               |                                                                                          |
|-------------------------------|------------------------------------------------------------------------------------------|
| <i>A.striata,-</i>            | Colecci                                                                                  |
| 72.94090700000,5.77458700000  | ón: Castañeda, María del Rosario, Osorio F, Agronomía Colombiana, 28(2), 264-272.        |
| <i>A.striata,-</i>            | Colecci                                                                                  |
| 75.36386200000,5.97506900000  | ón: Castañeda, María del Rosario, Osorio F, Agronomía Colombiana, 28(2), 264-272.        |
| <i>A.striata,-</i>            | Colecci                                                                                  |
| 74.63879200000,4.46231900000  | ón: Castañeda, María del Rosario, Osorio F, Agronomía Colombiana, 28(2), 264-272.        |
| <i>A.striata,-</i>            | Colecci                                                                                  |
| 74.38344800000,4.33061900000  | ón: Castañeda, María del Rosario, Osorio F, Agronomía Colombiana, 28(2), 264-272.        |
| <i>A.striata,-</i>            | Colecci                                                                                  |
| 74.16138500000,5.13135300000  | ón: Castañeda, María del Rosario, Osorio F, Agronomía Colombiana, 28(2), 264-272.        |
| <i>A.striata,-</i>            | Colecci                                                                                  |
| 73.78566700000,5.87790300000  | ón: Castañeda, María del Rosario, Osorio F, Agronomía Colombiana, 28(2), 264-272.        |
| <i>A.striata,-</i>            | Colecci                                                                                  |
| 74.98333300000,3.58333300000  | ón: Castañeda, María del Rosario, Osorio F, Agronomía Colombiana, 28(2), 264-272.        |
| <i>A.striata,-</i>            |                                                                                          |
| 76.51425000000,3.80703000000  | GBIF <a href="https://doi.org/10.15468/dl.frjaxe">https://doi.org/10.15468/dl.frjaxe</a> |
| <i>A.striata,-</i>            | Colecci                                                                                  |
| 76.49350000000,7.69968000000  | ón: Castañeda, María del Rosario, Osorio F, Agronomía Colombiana, 28(2), 264-272.        |
| <i>A.striata,-</i>            | Colecci                                                                                  |
| 76.05015000000,4.66771000000  | ón: Castañeda, María del Rosario, Osorio F, Agronomía Colombiana, 28(2), 264-272.        |
| <i>A.striata,-</i>            | Colecci                                                                                  |
| 75.19028000000,4.09556000000  | ón: Castañeda, María del Rosario, Osorio F, Agronomía Colombiana, 28(2), 264-272.        |
| <i>A.striata,-</i>            | Colecci                                                                                  |
| 76.58880000000,4.41789000000  | ón: Castañeda, María del Rosario, Osorio F, Agronomía Colombiana, 28(2), 264-272.        |
| <i>A.striata,-</i>            | Colecci                                                                                  |
| 74.47483300000,5.05977800000  | ón: Castañeda, María del Rosario, Osorio F, Agronomía Colombiana, 28(2), 264-272.        |
| <i>A.striata,-</i>            | Colecci                                                                                  |
| 75.06660000000,4.91660000000  | ón: Castañeda, María del Rosario, Osorio F, Agronomía Colombiana, 28(2), 264-272.        |
| <i>A.striata,-</i>            | Colecci                                                                                  |
| 75.83216700000,8.71145300000  | ón: ICA-Boletines epidemiológicos Plan Nacional Moscas de la Fruta; iv trimestre 2015    |
| <i>A.striata,-</i>            | Colecci                                                                                  |
| 75.84060100000,9.01638200000  | ón: ICA-Boletines epidemiológicos Plan Nacional Moscas de la Fruta; iv trimestre 2015    |
| <i>A.striata,-</i>            | Colecci                                                                                  |
| 75.42444600000,9.66544000000  | ón: ICA-Boletines epidemiológicos Plan Nacional Moscas de la Fruta; iv trimestre 2015    |
| <i>A.striata,-</i>            | Colecci                                                                                  |
| 75.46716100000,8.20190600000  | ón: ICA-Boletines epidemiológicos Plan Nacional Moscas de la Fruta; iv trimestre 2015    |
| <i>A.striata,-</i>            | Colecci                                                                                  |
| 72.25103600000,11.39039500000 | ón: ICA-Boletines epidemiológicos Plan Nacional Moscas de la Fruta; iv trimestre 2015    |
| <i>A.striata,-</i>            | Colecci                                                                                  |
| 72.85024700000,10.88772800000 | ón: ICA-Boletines epidemiológicos Plan Nacional Moscas de la Fruta; iv trimestre 2015    |

|                                    |                                                                                          |
|------------------------------------|------------------------------------------------------------------------------------------|
| <i>A.striata,-</i>                 | Colecci                                                                                  |
| 72.9911800000,10.59342200000       | ón: ICA-Boletines epidemiológicos Plan Nacional Moscas de la Fruta; iv trimestre 2015    |
| <i>A.striata,-</i>                 | Colecci                                                                                  |
| 72.66581700000,7.37463400000       | ón: ICA-Boletines epidemiológicos Plan Nacional Moscas de la Fruta; iv trimestre 2015    |
| <i>A.striata,-</i>                 | Colecci                                                                                  |
| 74.92326100000,10.25819500000      | ón: ICA-Boletines epidemiológicos Plan Nacional Moscas de la Fruta; iv trimestre 2015    |
| <i>A.striata,-</i>                 | Colecci                                                                                  |
| 75.30921400000,10.58380500000      | ón: ICA-Boletines epidemiológicos Plan Nacional Moscas de la Fruta; iv trimestre 2015    |
| <i>A.striata,-</i>                 | Colecci                                                                                  |
| 73.37168800000,5.70711900000       | ón: ICA-Boletines epidemiológicos Plan Nacional Moscas de la Fruta; iv trimestre 2015    |
| <i>A.striata,-</i>                 | Colecci                                                                                  |
| 76.52006700000,2.95710000000       | ón: ICA-Boletines epidemiológicos Plan Nacional Moscas de la Fruta; iv trimestre 2015    |
| <i>A.striata,-</i>                 | Colecci                                                                                  |
| 76.95774000000,2.66246100000       | ón: ICA-Boletines epidemiológicos Plan Nacional Moscas de la Fruta; iv trimestre 2015    |
| <i>A.striata,-</i>                 | Colecci                                                                                  |
| 73.95679800000,3.41815000000       | ón: ICA-Boletines epidemiológicos Plan Nacional Moscas de la Fruta; iv trimestre 2015    |
| <i>A.striata,-</i>                 | Colecci                                                                                  |
| 77.67642500000,0.83267900000       | ón: ICA-Boletines epidemiológicos Plan Nacional Moscas de la Fruta; iv trimestre 2015    |
| <i>A.striata,-</i>                 | Colecci                                                                                  |
| 78.75566700000,1.67524600000       | ón: ICA-Boletines epidemiológicos Plan Nacional Moscas de la Fruta; iv trimestre 2015    |
| <i>A.striata,-</i>                 | Colecci                                                                                  |
| 77.12716800000,1.58076000000       | ón: ICA-Boletines epidemiológicos Plan Nacional Moscas de la Fruta; iv trimestre 2015    |
| <i>A.striata,-</i>                 | Colecci                                                                                  |
| 77.32179900000,1.15113000000       | ón: ICA-Boletines epidemiológicos Plan Nacional Moscas de la Fruta; iv trimestre 2015    |
| <i>A.striata,-69.93980800000,-</i> | Colecci                                                                                  |
| 4.21910200000                      | ón: ICA-Boletines epidemiológicos Plan Nacional Moscas de la Fruta; iv trimestre 2015    |
| <i>A.striata,-</i>                 | Colecci                                                                                  |
| 70.46346800000,6.93217900000       | ón: ICA-Boletines epidemiológicos Plan Nacional Moscas de la Fruta; iv trimestre 2015    |
| <i>A.striata,-</i>                 | Colecci                                                                                  |
| 71.17143900000,6.89702000000       | ón: ICA-Boletines epidemiológicos Plan Nacional Moscas de la Fruta; iv trimestre 2015    |
| <i>A.striata,-</i>                 | Colecci                                                                                  |
| 71.85863000000,6.99601900000       | ón: ICA-Boletines epidemiológicos Plan Nacional Moscas de la Fruta; iv trimestre 2015    |
| <i>A.striata,-</i>                 | Colecci                                                                                  |
| 67.65223100000,5.69736600000       | ón: ICA-Boletines epidemiológicos Plan Nacional Moscas de la Fruta; iv trimestre 2015    |
| <i>A.striata,-</i>                 | Colecci                                                                                  |
| 67.50047200000,6.18940700000       | ón: ICA-Boletines epidemiológicos Plan Nacional Moscas de la Fruta; iv trimestre 2015    |
| <i>A.striata,-</i>                 |                                                                                          |
| 75.61863100000,4.52587400000       | GBIF <a href="https://doi.org/10.15468/dl.frjaxe">https://doi.org/10.15468/dl.frjaxe</a> |
| <i>A.striata,-</i>                 |                                                                                          |
| 75.66645700000,4.81886500000       | GBIF <a href="https://doi.org/10.15468/dl.frjaxe">https://doi.org/10.15468/dl.frjaxe</a> |

|                               |         |                                                                                                                                       |
|-------------------------------|---------|---------------------------------------------------------------------------------------------------------------------------------------|
| <i>A.striata</i> , -          | Colecci |                                                                                                                                       |
| 75.96585400000,5.08053300000  | ón:     | ICA-Boletines epidemiológicos Plan Nacional Moscas de la Fruta; iv trimestre 2015                                                     |
| <i>A.striata</i> , -          | Colecci |                                                                                                                                       |
| 76.88412000000,0.41398000000  | ón:     | ICA-Boletines epidemiológicos Plan Nacional Moscas de la Fruta; iv trimestre 2015                                                     |
| <i>A.striata</i> , -          | Colecci |                                                                                                                                       |
| 75.33304500000,1.56190200000  | ón:     | ICA-Boletines epidemiológicos Plan Nacional Moscas de la Fruta; iv trimestre 2015                                                     |
| <i>A.striata</i> , -          | Colecci |                                                                                                                                       |
| 75.72849100000,1.49458400000  | ón:     | ICA-Boletines epidemiológicos Plan Nacional Moscas de la Fruta; iv trimestre 2015                                                     |
| <i>A.striata</i> , -          | Colecci |                                                                                                                                       |
| 75.96255100000,1.33179500000  | ón:     | ICA-Boletines epidemiológicos Plan Nacional Moscas de la Fruta; iv trimestre 2015                                                     |
| <i>A.striata</i> , -          |         |                                                                                                                                       |
| 88.75000000000,17.25000000000 | CABI    | <a href="https://www.cabidigitallibrary.org">https://www.cabidigitallibrary.org</a> (Last access March 3, 2022 CABI 1943-2020 - 5657) |
| <i>A.striata</i> , -          |         |                                                                                                                                       |
| 84.00000000000,10.00000000000 | GBIF    | <a href="https://doi.org/10.15468/dl.frjaxe">https://doi.org/10.15468/dl.frjaxe</a>                                                   |
| <i>A.striata</i> , -          |         |                                                                                                                                       |
| 82.95627500000,9.51934900000  | SV      | <a href="https://mida.gob.pa/sanidad-vegetal">https://mida.gob.pa/sanidad-vegetal</a>                                                 |
| <i>A.striata</i> , -          |         |                                                                                                                                       |
| 83.74200500000,10.64405000000 | GBIF    | <a href="https://doi.org/10.15468/dl.frjaxe">https://doi.org/10.15468/dl.frjaxe</a>                                                   |
| <i>A.striata</i> , -          |         |                                                                                                                                       |
| 84.48510100000,10.20136100000 | GBIF    | <a href="https://doi.org/10.15468/dl.frjaxe">https://doi.org/10.15468/dl.frjaxe</a>                                                   |
| <i>A.striata</i> , -          |         |                                                                                                                                       |
| 83.06352300000,9.82279500000  | GBIF    | <a href="https://doi.org/10.15468/dl.frjaxe">https://doi.org/10.15468/dl.frjaxe</a>                                                   |
| <i>A.striata</i> , -          |         |                                                                                                                                       |
| 82.77110500000,8.89594200000  | GBIF    | <a href="https://doi.org/10.15468/dl.frjaxe">https://doi.org/10.15468/dl.frjaxe</a>                                                   |
| <i>A.striata</i> , -          |         |                                                                                                                                       |
| 85.05995200000,9.86709500000  | GBIF    | <a href="https://doi.org/10.15468/dl.frjaxe">https://doi.org/10.15468/dl.frjaxe</a>                                                   |
| <i>A.striata</i> , -          |         |                                                                                                                                       |
| 85.63359700000,10.13425900000 | GBIF    | <a href="https://doi.org/10.15468/dl.frjaxe">https://doi.org/10.15468/dl.frjaxe</a>                                                   |
| <i>A.striata</i> , -          |         |                                                                                                                                       |
| 83.22732800000,8.68065600000  | GBIF    | <a href="https://doi.org/10.15468/dl.frjaxe">https://doi.org/10.15468/dl.frjaxe</a>                                                   |
| <i>A.striata</i> , -          |         |                                                                                                                                       |
| 85.24638400000,10.33497400000 | GBIF    | <a href="https://doi.org/10.15468/dl.frjaxe">https://doi.org/10.15468/dl.frjaxe</a>                                                   |
| <i>A.striata</i> , -          |         |                                                                                                                                       |
| 84.00818700000,10.43195700000 | GBIF    | <a href="https://doi.org/10.15468/dl.frjaxe">https://doi.org/10.15468/dl.frjaxe</a>                                                   |
| <i>A.striata</i> , -          |         |                                                                                                                                       |
| 83.52255000000,8.57016300000  | GBIF    | <a href="https://doi.org/10.15468/dl.frjaxe">https://doi.org/10.15468/dl.frjaxe</a>                                                   |
| <i>A.striata</i> , -          |         |                                                                                                                                       |
| 83.59565200000,9.39570100000  | GBIF    | <a href="https://doi.org/10.15468/dl.frjaxe">https://doi.org/10.15468/dl.frjaxe</a>                                                   |
| <i>A.striata</i> , -          |         |                                                                                                                                       |
| 84.79662000000,10.27672300000 | GBIF    | <a href="https://doi.org/10.15468/dl.frjaxe">https://doi.org/10.15468/dl.frjaxe</a>                                                   |

|                                                         |      |                                                                                                                                       |
|---------------------------------------------------------|------|---------------------------------------------------------------------------------------------------------------------------------------|
| <i>A. striata</i> , -<br>83.01452800000,9.03118400000   | GBIF | <a href="https://doi.org/10.15468/dl.frjaxe">https://doi.org/10.15468/dl.frjaxe</a>                                                   |
| <i>A. striata</i> , -<br>83.69493600000,9.97397900000   | GBIF | <a href="https://doi.org/10.15468/dl.frjaxe">https://doi.org/10.15468/dl.frjaxe</a>                                                   |
| <i>A. striata</i> , -<br>85.35191300000,10.77678400000  | GBIF | <a href="https://doi.org/10.15468/dl.frjaxe">https://doi.org/10.15468/dl.frjaxe</a>                                                   |
| <i>A. striata</i> , -<br>85.02321800000,10.57558900000  | GBIF | <a href="https://doi.org/10.15468/dl.frjaxe">https://doi.org/10.15468/dl.frjaxe</a>                                                   |
| <i>A. striata</i> , -<br>85.57695300000,11.03365700000  | GBIF | <a href="https://doi.org/10.15468/dl.frjaxe">https://doi.org/10.15468/dl.frjaxe</a>                                                   |
| <i>A. striata</i> , -<br>90.25000000000,15.50000000000  | CABI | <a href="https://www.cabidigitallibrary.org">https://www.cabidigitallibrary.org</a> (Last access March 3, 2022 CABI 1943-2020 - 5657) |
| <i>A. striata</i> , -<br>86.50000000000,15.00000000000  | CABI | <a href="https://www.cabidigitallibrary.org">https://www.cabidigitallibrary.org</a> (Last access March 3, 2022 CABI 1943-2020 - 5657) |
| <i>A. striata</i> , -<br>87.00363100000,14.01429900000  | GBIF | <a href="https://doi.org/10.15468/dl.frjaxe">https://doi.org/10.15468/dl.frjaxe</a>                                                   |
| <i>A. striata</i> , -<br>102.00000000000,23.00000000000 | CABI | <a href="https://www.cabidigitallibrary.org">https://www.cabidigitallibrary.org</a> (Last access March 3, 2022 CABI 1943-2020 - 5657) |
| <i>A. striata</i> , -<br>98.05000300000,25.95999900000  | GBIF | <a href="https://doi.org/10.15468/dl.frjaxe">https://doi.org/10.15468/dl.frjaxe</a>                                                   |
| <i>A. striata</i> , -<br>99.09305300000,18.98480200000  | GBIF | <a href="https://doi.org/10.15468/dl.frjaxe">https://doi.org/10.15468/dl.frjaxe</a>                                                   |
| <i>A. striata</i> , -<br>103.39070300000,20.66824300000 | GBIF | <a href="https://doi.org/10.15468/dl.frjaxe">https://doi.org/10.15468/dl.frjaxe</a>                                                   |
| <i>A. striata</i> , -<br>92.39900000000,15.01100000000  | GBIF | <a href="https://doi.org/10.15468/dl.frjaxe">https://doi.org/10.15468/dl.frjaxe</a>                                                   |
| <i>A. striata</i> , -<br>92.18300000000,14.81700000000  | GBIF | <a href="https://doi.org/10.15468/dl.frjaxe">https://doi.org/10.15468/dl.frjaxe</a>                                                   |
| <i>A. striata</i> , -<br>85.00000000000,13.00000000000  | CABI | <a href="https://www.cabidigitallibrary.org">https://www.cabidigitallibrary.org</a> (Last access March 3, 2022 CABI 1943-2020 - 5657) |
| <i>A. striata</i> , -<br>80.00000000000,9.00000000000   | CABI | <a href="https://www.cabidigitallibrary.org">https://www.cabidigitallibrary.org</a> (Last access March 3, 2022 CABI 1943-2020 - 5657) |
| <i>A. striata</i> , -63.65000200000,-<br>18.12999900000 | GBIF | <a href="https://doi.org/10.15468/dl.frjaxe">https://doi.org/10.15468/dl.frjaxe</a>                                                   |
| <i>A. striata</i> , -64.53731000000,-<br>17.19727700000 | GBIF | <a href="https://doi.org/10.15468/dl.frjaxe">https://doi.org/10.15468/dl.frjaxe</a>                                                   |
| <i>A. striata</i> , -64.86225000000,-<br>17.04622000000 | GBIF | <a href="https://doi.org/10.15468/dl.frjaxe">https://doi.org/10.15468/dl.frjaxe</a>                                                   |
| <i>A. striata</i> , -63.65335000000,-<br>17.49542000000 | GBIF | <a href="https://doi.org/10.15468/dl.frjaxe">https://doi.org/10.15468/dl.frjaxe</a>                                                   |



|                                                         |      |                                                                                                                                       |
|---------------------------------------------------------|------|---------------------------------------------------------------------------------------------------------------------------------------|
| <i>A. striata</i> , -63.37363000000,-<br>17.99858000000 | GBIF | <a href="https://doi.org/10.15468/dl.frjaxe">https://doi.org/10.15468/dl.frjaxe</a>                                                   |
| <i>A. striata</i> , -55.00000000000,-<br>10.00000000000 | CABI | <a href="https://www.cabidigitallibrary.org">https://www.cabidigitallibrary.org</a> (Last access March 3, 2022 CABI 1943-2020 - 5657) |
| <i>A. striata</i> , -70.00000000000,-<br>9.00000000000  | CABI | <a href="https://www.cabidigitallibrary.org">https://www.cabidigitallibrary.org</a> (Last access March 3, 2022 CABI 1943-2020 - 5657) |
| <i>A. striata</i> , -<br>52.00000000000, 1.00000000000  | CABI | <a href="https://www.cabidigitallibrary.org">https://www.cabidigitallibrary.org</a> (Last access March 3, 2022 CABI 1943-2020 - 5657) |
| <i>A. striata</i> , -64.50000000000,-<br>3.75000000000  | CABI | <a href="https://www.cabidigitallibrary.org">https://www.cabidigitallibrary.org</a> (Last access March 3, 2022 CABI 1943-2020 - 5657) |
| <i>A. striata</i> , -49.63623000000,-<br>15.58071000000 | CABI | <a href="https://www.cabidigitallibrary.org">https://www.cabidigitallibrary.org</a> (Last access March 3, 2022 CABI 1943-2020 - 5657) |
| <i>A. striata</i> , -45.00000000000,-<br>5.00000000000  | CABI | <a href="https://www.cabidigitallibrary.org">https://www.cabidigitallibrary.org</a> (Last access March 3, 2022 CABI 1943-2020 - 5657) |
| <i>A. striata</i> , -55.00000000000,-<br>20.50000000000 | CABI | <a href="https://www.cabidigitallibrary.org">https://www.cabidigitallibrary.org</a> (Last access March 3, 2022 CABI 1943-2020 - 5657) |
| <i>A. striata</i> , -44.00000000000,-<br>18.00000000000 | CABI | <a href="https://www.cabidigitallibrary.org">https://www.cabidigitallibrary.org</a> (Last access March 3, 2022 CABI 1943-2020 - 5657) |
| <i>A. striata</i> , -53.00000000000,-<br>4.00000000000  | CABI | <a href="https://www.cabidigitallibrary.org">https://www.cabidigitallibrary.org</a> (Last access March 3, 2022 CABI 1943-2020 - 5657) |
| <i>A. striata</i> , -42.33333000000,-<br>7.25000000000  | CABI | <a href="https://www.cabidigitallibrary.org">https://www.cabidigitallibrary.org</a> (Last access March 3, 2022 CABI 1943-2020 - 5657) |
| <i>A. striata</i> , -63.00000000000,-<br>11.00000000000 | CABI | <a href="https://www.cabidigitallibrary.org">https://www.cabidigitallibrary.org</a> (Last access March 3, 2022 CABI 1943-2020 - 5657) |
| <i>A. striata</i> , -<br>61.25000000000, 2.25000000000  | CABI | <a href="https://www.cabidigitallibrary.org">https://www.cabidigitallibrary.org</a> (Last access March 3, 2022 CABI 1943-2020 - 5657) |
| <i>A. striata</i> , -49.00000000000,-<br>22.00000000000 | CABI | <a href="https://www.cabidigitallibrary.org">https://www.cabidigitallibrary.org</a> (Last access March 3, 2022 CABI 1943-2020 - 5657) |
| <i>A. striata</i> , -48.00000000000,-<br>10.50000000000 | CABI | <a href="https://www.cabidigitallibrary.org">https://www.cabidigitallibrary.org</a> (Last access March 3, 2022 CABI 1943-2020 - 5657) |
| <i>A. striata</i> , -<br>73.25000000000, 4.00000000000  | CABI | <a href="https://www.cabidigitallibrary.org">https://www.cabidigitallibrary.org</a> (Last access March 3, 2022 CABI 1943-2020 - 5657) |
| <i>A. striata</i> , -<br>75.33640000000, 4.40909000000  | GBIF | <a href="https://doi.org/10.15468/dl.frjaxe">https://doi.org/10.15468/dl.frjaxe</a>                                                   |
| <i>A. striata</i> , -<br>77.00000000000, 3.81000000000  | GBIF | <a href="https://doi.org/10.15468/dl.frjaxe">https://doi.org/10.15468/dl.frjaxe</a>                                                   |
| <i>A. striata</i> , -<br>76.91000400000, 4.28000000000  | GBIF | <a href="https://doi.org/10.15468/dl.frjaxe">https://doi.org/10.15468/dl.frjaxe</a>                                                   |
| <i>A. striata</i> , -<br>76.57000000000, 3.37000000000  | GBIF | <a href="https://doi.org/10.15468/dl.frjaxe">https://doi.org/10.15468/dl.frjaxe</a>                                                   |

|                                                         |      |                                                                                                                                       |
|---------------------------------------------------------|------|---------------------------------------------------------------------------------------------------------------------------------------|
| <i>A.striata</i> , -<br>76.77999900000,3.58000000000    | GBIF | <a href="https://doi.org/10.15468/dl.frjaxe">https://doi.org/10.15468/dl.frjaxe</a>                                                   |
| <i>A.striata</i> , -<br>75.62549200000,6.15710200000    | GBIF | <a href="https://doi.org/10.15468/dl.frjaxe">https://doi.org/10.15468/dl.frjaxe</a>                                                   |
| <i>A.striata</i> , -78.25000000000, -<br>1.25000000000  | CABI | <a href="https://www.cabidigitallibrary.org">https://www.cabidigitallibrary.org</a> (Last access March 3, 2022 CABI 1943-2020 - 5657) |
| <i>A.striata</i> , -<br>53.00000000000,4.00000000000    | CABI | <a href="https://www.cabidigitallibrary.org">https://www.cabidigitallibrary.org</a> (Last access March 3, 2022 CABI 1943-2020 - 5657) |
| <i>A.striata</i> , -<br>52.33110000000,4.84720000000    | GBIF | <a href="https://doi.org/10.15468/dl.frjaxe">https://doi.org/10.15468/dl.frjaxe</a>                                                   |
| <i>A.striata</i> , -<br>58.93020000000,4.86040000000    | GBIF | <a href="https://doi.org/10.15468/dl.frjaxe">https://doi.org/10.15468/dl.frjaxe</a>                                                   |
| <i>A.striata</i> , -58.00000000000, -<br>23.33333000000 | CABI | <a href="https://www.cabidigitallibrary.org">https://www.cabidigitallibrary.org</a> (Last access March 3, 2022 CABI 1943-2020 - 5657) |
| <i>A.striata</i> , -75.25000000000, -<br>10.00000000000 | CABI | <a href="https://www.cabidigitallibrary.org">https://www.cabidigitallibrary.org</a> (Last access March 3, 2022 CABI 1943-2020 - 5657) |
| <i>A.striata</i> , -71.40000200000, -<br>12.89000000000 | GBIF | <a href="https://doi.org/10.15468/dl.frjaxe">https://doi.org/10.15468/dl.frjaxe</a>                                                   |
| <i>A.striata</i> , -74.93403000000, -<br>9.61786500000  | GBIF | <a href="https://doi.org/10.15468/dl.frjaxe">https://doi.org/10.15468/dl.frjaxe</a>                                                   |
| <i>A.striata</i> , -<br>56.00000000000,4.00000000000    | CABI | <a href="https://www.cabidigitallibrary.org">https://www.cabidigitallibrary.org</a> (Last access March 3, 2022 CABI 1943-2020 - 5657) |
| <i>A.striata</i> , -<br>66.00000000000,8.00000000000    | CABI | <a href="https://www.cabidigitallibrary.org">https://www.cabidigitallibrary.org</a> (Last access March 3, 2022 CABI 1943-2020 - 5657) |
| <i>A.striata</i> , -<br>66.58970000000,6.42380000000    | CABI | <a href="https://www.cabidigitallibrary.org">https://www.cabidigitallibrary.org</a> (Last access March 3, 2022 CABI 1943-2020 - 5657) |
| <i>A.striata</i> , -<br>71.63330000000,10.63330000000   | GBIF | <a href="https://doi.org/10.15468/dl.frjaxe">https://doi.org/10.15468/dl.frjaxe</a>                                                   |
| <i>A.striata</i> , -<br>89.32000000000,13.93000000000   | GBIF | <a href="https://doi.org/10.15468/dl.frjaxe">https://doi.org/10.15468/dl.frjaxe</a>                                                   |
| <i>A.striata</i> , -<br>77.81247500000,8.29205000000    | SV   | <a href="https://mida.gob.pa/sanidad-vegetal">https://mida.gob.pa/sanidad-vegetal</a>                                                 |
| <i>A.striata</i> , -<br>78.01024400000,8.54738300000    | SV   | <a href="https://mida.gob.pa/sanidad-vegetal">https://mida.gob.pa/sanidad-vegetal</a>                                                 |
| <i>A.striata</i> , -<br>78.19135800000,8.83184600000    | SV   | <a href="https://mida.gob.pa/sanidad-vegetal">https://mida.gob.pa/sanidad-vegetal</a>                                                 |
| <i>A.striata</i> , -<br>79.68582300000,9.29644500000    | SV   | <a href="https://mida.gob.pa/sanidad-vegetal">https://mida.gob.pa/sanidad-vegetal</a>                                                 |
| <i>A.striata</i> , -<br>80.28973600000,8.71511800000    | SV   | <a href="https://mida.gob.pa/sanidad-vegetal">https://mida.gob.pa/sanidad-vegetal</a>                                                 |

|                                                       |             |                                                                                       |
|-------------------------------------------------------|-------------|---------------------------------------------------------------------------------------|
| <i>A.striata,-</i><br>80.55315700000,8.49522700000    | SV          | <a href="https://mida.gob.pa/sanidad-vegetal">https://mida.gob.pa/sanidad-vegetal</a> |
| <i>A.striata,-</i><br>80.57967300000,8.80280600000    | SV          | <a href="https://mida.gob.pa/sanidad-vegetal">https://mida.gob.pa/sanidad-vegetal</a> |
| <i>A.striata,-</i><br>80.86193800000,8.00792900000    | SV          | <a href="https://mida.gob.pa/sanidad-vegetal">https://mida.gob.pa/sanidad-vegetal</a> |
| <i>A.striata,-</i><br>82.24505100000,8.99694500000    | SV          | <a href="https://mida.gob.pa/sanidad-vegetal">https://mida.gob.pa/sanidad-vegetal</a> |
| <i>A.striata,-</i><br>82.51855300000,8.68478900000    | SV          | <a href="https://mida.gob.pa/sanidad-vegetal">https://mida.gob.pa/sanidad-vegetal</a> |
| <i>A.striata,-</i><br>82.57429800000,9.35321400000    | SV          | <a href="https://mida.gob.pa/sanidad-vegetal">https://mida.gob.pa/sanidad-vegetal</a> |
| <i>A.striata,-</i> 51.46110153000,-<br>29.68860000000 | SPECI<br>ES | <a href="http://www.splink.org.br/">http://www.splink.org.br/</a>                     |
| <i>A.striata,-</i> 80.60981476000,-<br>5.19526700000  | SV          | <a href="https://mida.gob.pa/sanidad-vegetal">https://mida.gob.pa/sanidad-vegetal</a> |

speciesLink network, 16-Jun-2022  
12:13, [specieslink.net/search](https://specieslink.net/search)

**Table S2: Main environmental variables that contribute to the model for (*A. grandis*, *A. serpentina*, *A. obliqua*, *A. striata*)**

**1. Main environmental variables that contribute to the MaxEnt model for *A. grandis*.**

| Set 1 | Set 2        | Set 3        | Set 4        | Set 5                         | Set 6                        | Set 7                        | Set 8                                  |
|-------|--------------|--------------|--------------|-------------------------------|------------------------------|------------------------------|----------------------------------------|
| All   | EVI_range    | EVI_min      | EVI_range    | All variables related to NDVI | All variables related to EVI | All variables related to LST | All variables related to precipitation |
|       | LST_range    | NDVI_max     | LST_min      |                               |                              |                              |                                        |
|       | NDVI_range   | NDVI_range   | PRECIP_range |                               |                              |                              |                                        |
|       | PRECIP_range | PRECIP_range | NDVI_max     |                               |                              |                              |                                        |
|       | PRECIP_max   | EVI_range    | NDVI_range   |                               |                              |                              |                                        |
|       | PRECIP_mean  |              | PRECIP_min   |                               |                              |                              |                                        |
|       | PRECIP_min   |              | LST_range    |                               |                              |                              |                                        |

**2. Main environmental variables that contribute to the MaxEnt model for *A. serpentina*.**

| Set 1 | Set 2        | Set 3        | Set 4        | Set 5                         | Set 6                        | Set 7                        | Set 8                                  |
|-------|--------------|--------------|--------------|-------------------------------|------------------------------|------------------------------|----------------------------------------|
| All   | EVI_range    | EVI_range    | EVI_max      | All variables related to NDVI | All variables related to EVI | All variables related to LST | All variables related to precipitation |
|       |              |              |              |                               |                              |                              |                                        |
|       | LST_max      | NDVI_min     | EVI_range    |                               |                              |                              |                                        |
|       | LST_mean     | PRECIP_range | LST_min      |                               |                              |                              |                                        |
|       | LST_min      | EVI_mean     | LST_range    |                               |                              |                              |                                        |
|       | LST_range    | LST_range    | NDVI_range   |                               |                              |                              |                                        |
|       | NDVI_range   | LST_min      | PRECIP_min   |                               |                              |                              |                                        |
|       | PRECIP_max   | EVI_max      | PRECIP_range |                               |                              |                              |                                        |
|       | PRECIP_mean  |              |              |                               |                              |                              |                                        |
|       | PRECIP_min   |              |              |                               |                              |                              |                                        |
|       | PRECIP_range |              |              |                               |                              |                              |                                        |

**3. Main environmental variables that contribute to the MaxEnt model for *A. obliqua*.**

| Set 1 | Set 2       | Set 3        | Set 4        | Set 5                         | Set 6                        | Set 7                        | Set 8                                  |
|-------|-------------|--------------|--------------|-------------------------------|------------------------------|------------------------------|----------------------------------------|
| All   | EVI_range   | EVI_range    | EVI_max      | All variables related to NDVI | All variables related to EVI | All variables related to LST | All variables related to precipitation |
|       | LST_max     | PRECIP_range | EVI_range    |                               |                              |                              |                                        |
|       | LST_mean    | PRECIP_min   | LST_min      |                               |                              |                              |                                        |
|       | LST_min     | LST_min      | LST_range    |                               |                              |                              |                                        |
|       | LST_range   | NDVI_range   | NDVI_range   |                               |                              |                              |                                        |
|       | NDVI_range  |              | PRECIP_min   |                               |                              |                              |                                        |
|       | PRECIP_max  |              | PRECIP_range |                               |                              |                              |                                        |
|       | PRECIP_mean |              |              |                               |                              |                              |                                        |
|       | PRECIP_min  |              |              |                               |                              |                              |                                        |

**4. Main environmental variables that contribute to the MaxEnt model for *A. striata*.**

| Set 1 | Set 2        | Set 3      | Set 4        | Set 5                         | Set 6                        | Set 7                        | Set 8                                  |
|-------|--------------|------------|--------------|-------------------------------|------------------------------|------------------------------|----------------------------------------|
| All   | EVI_range    | LST_range  | EVI_max      | All variables related to NDVI | All variables related to EVI | All variables related to LST | All variables related to precipitation |
|       |              |            |              |                               |                              |                              |                                        |
|       | LST_max      | LST_min    | EVI_range    |                               |                              |                              |                                        |
|       | LST_mean     | EVI_max    | LST_min      |                               |                              |                              |                                        |
|       | LST_min      | PRECIP_min | LST_range    |                               |                              |                              |                                        |
|       | LST_range    |            | NDVI_range   |                               |                              |                              |                                        |
|       | NDVI_range   |            | PRECIP_min   |                               |                              |                              |                                        |
|       | PRECIP_max   |            | PRECIP_range |                               |                              |                              |                                        |
|       | PRECIP_mean  |            |              |                               |                              |                              |                                        |
|       | PRECIP_min   |            |              |                               |                              |                              |                                        |
|       | PRECIP_range |            |              |                               |                              |                              |                                        |

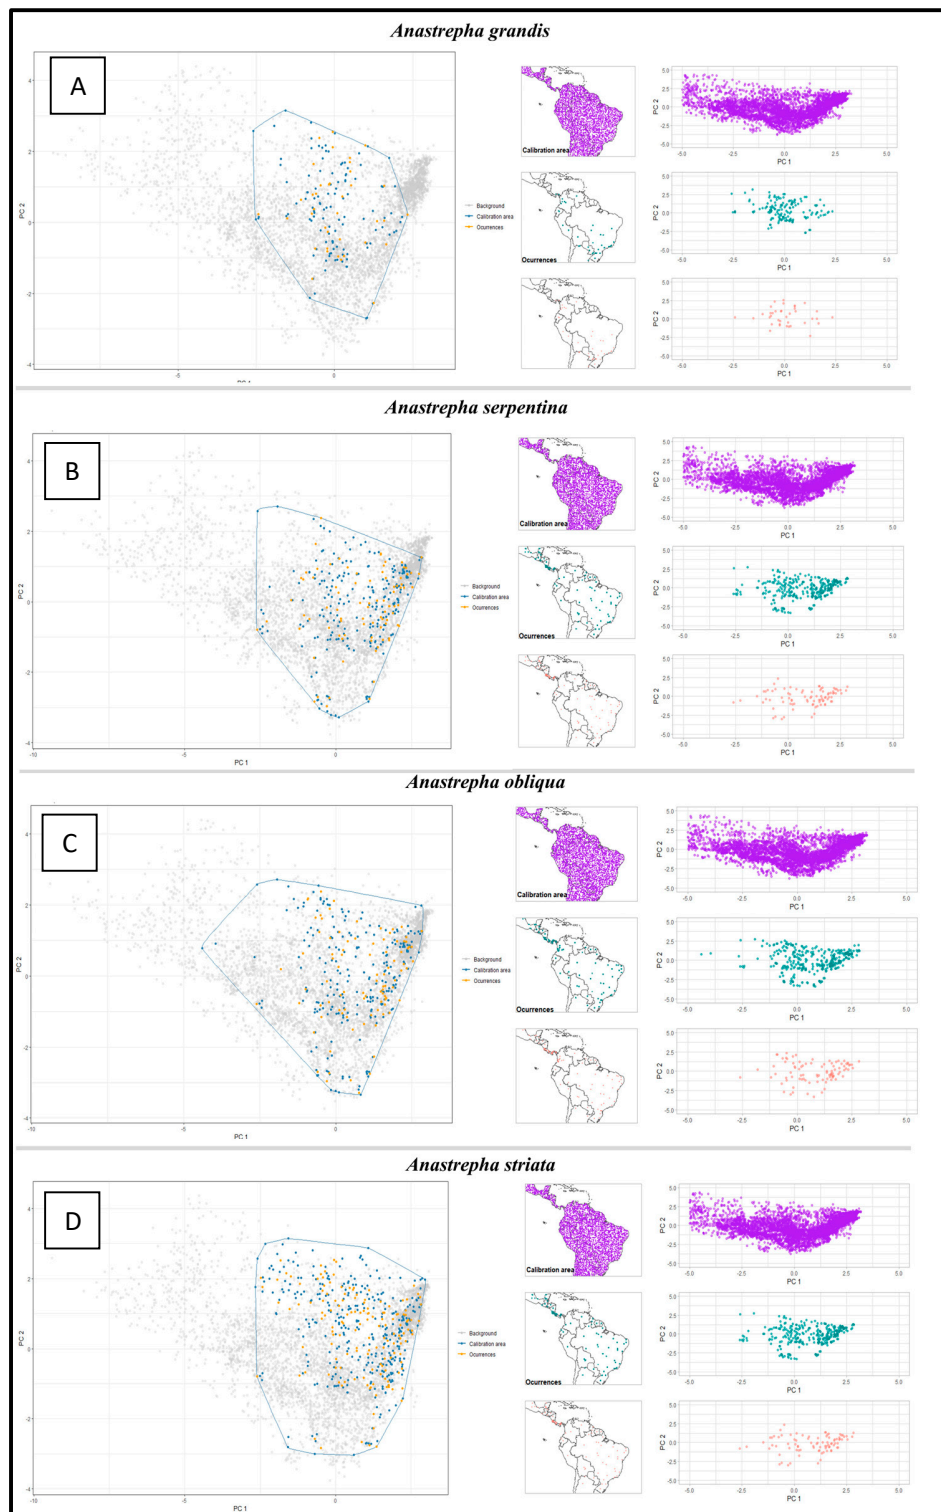

Figure S1. Analysis of the environmental space represented by presence records, calibration area and projection area.
